# Supplementary material
Source: ML conference proceedings conference paper supplement (https://proceedings.neurips.cc/paper_files/paper/2018/hash/bdb3c278f45e6734c35733d24299d3f4-Abstract.html)
Supplement: Supplementary file [file bdb3c278f45e6734c35733d24299d3f4-Supplemental.zip]

# Supplementary Material for Transfer Learning with Neural AutoML

Catherine Wong  
MIT  
catwong@mit.edu

Neil Houlsby  
Google Brain  
neilhoulby@google.com

Yifeng Lu  
Google Brain  
yifengl@google.com

Andrea Gesmundo  
Google Brain  
agesmundo@google.com

This document contains a description of the search space used in our experiments (Table 1), details of the pretrained modules for embedding text and images (Tables 2 and 3), and statistics for the datasets used (Table 4 and 5). It also contains the learning curves for Transfer Neural AutoML (Figures 1 and 2) and Multitask Neural AutoML (Figures 3 and 4) on the validation and test sets.

Table 1: The search space for our AML models.

| Parameter                            | Search Space                                                    |
|--------------------------------------|-----------------------------------------------------------------|
| 1) Input embedding modules           | Text input: refer to Table 2.<br>Image input: refer to Table 3. |
| 2) Fine-tune input embedding module  | {True, False}                                                   |
| 3) Number of hidden layers           | {1, 2, 3, 5, 7}                                                 |
| 4) Hidden layers size                | {8, 16, 32, 64, 128, 256}                                       |
| 5) Hidden layers activation          | {relu, swish}                                                   |
| 6) Hidden layers normalization       | {none, batch norm, layer norm}                                  |
| 7) Hidden layers dropout rate        | {0.0, 0.01, 0.05, 0.1, 0.2, 0.3, 0.4, 0.5, 0.6}                 |
| 8) Deep tower learning rate          | {0.001, 0.003, 0.01, 0.03, 0.1, 0.3, 1.0, 3.0}                  |
| 9) Deep tower regularization weight  | {0.0, 0.00001, 0.0001, 0.001, 0.01, 0.1, disable deep tower}    |
| 10) Wide tower learning rate         | {0.001, 0.003, 0.01, 0.03, 0.1, 0.3, 1.0, 3.0}                  |
| 11) Wide tower regularization weight | {0.0, 0.00001, 0.0001, 0.001, 0.01, 0.1, disable wide tower}    |
| 12) Number of training samples       | {1000, 3000, 10000, 30000, 100000, 300000, 1000000}             |

Table 2: Options for text input embedding modules. These are pre-trained text embedding tables, trained on datasets with different languages and size. The text input to these modules is tokenized according to the module dictionary and normalized by lower-casing and stripping rare characters. The embeddings of each token are aggregated with a mean BOW approach. We provide the handle for the modules that are publicly distributed via the TensorFlow Hub service (<https://www.tensorflow.org/hub>).

| Language/ID        | Dataset size (tokens) | Embed dim. | Vocab. size | Training algorithm | TensorFlow Hub Handles<br>Prefix: <a href="https://tfhub.dev/google/">https://tfhub.dev/google/</a> |
|--------------------|-----------------------|------------|-------------|--------------------|-----------------------------------------------------------------------------------------------------|
| Spanish-small      | 50B                   | 50         | 995k        | Lang. model        | <code>nnlm-es-dim50-with-normalization/1</code>                                                     |
| Spanish-big        | 50B                   | 128        | 995k        | Lang. model        | <code>nnlm-es-dim128-with-normalization/1</code>                                                    |
| English-small      | 7B                    | 50         | 982k        | Lang. model        | <code>nnlm-en-dim50-with-normalization/1</code>                                                     |
| English-big        | 200B                  | 128        | 999k        | Lang. model        | <code>nnlm-en-dim128-with-normalization/1</code>                                                    |
| English-wiki-small | 4B                    | 250        | 1M          | Skipgram           | <code>Wiki-words-250-with-normalization/1</code>                                                    |
| English-wiki-big   | 4B                    | 500        | 1M          | Skipgram           | <code>Wiki-words-500-with-normalization/1</code>                                                    |
| English-news-small | 90B                   | 100        | 5.9M        | CBOW               |                                                                                                     |
| English-news-big   | 90B                   | 500        | 5.9M        | CBOW               |                                                                                                     |

Table 3: Options for image input embedding modules. To map an image, the controller can choose among state of the art architectures pre-trained on ImageNet. The module consists in the pre-trained model up to the final layer of logits. We provide the handle for the modules that are publicly distributed via the TensorFlow Hub service (<https://www.tensorflow.org/hub>).

| Architecture  | Dataset  | Reference               | TensorFlow Hub Handles<br>Prefix: <a href="https://tfhub.dev/google/">https://tfhub.dev/google/</a> |
|---------------|----------|-------------------------|-----------------------------------------------------------------------------------------------------|
| MobileNet v1  | Imagenet | (Howard et al., 2017)   | <code>imagenet/mobilenet_v1_100_224/feature_vector/1</code>                                         |
| Inception v2  | Imagenet | (Ioffe & Szegedy, 2015) | <code>imagenet/inception_v2/feature_vector/1</code>                                                 |
| Inception v3  | Imagenet | (Szegedy et al., 2015)  | <code>imagenet/inception_v3/feature_vector/1</code>                                                 |
| Resnet v1.101 | Imagenet | (He et al., 2015)       | <code>imagenet/resnet_v1_101/feature_vector/1</code>                                                |
| Resnet v1.50  | Imagenet | (He et al., 2015)       | <code>imagenet/resnet_v1_50/feature_vector/1</code>                                                 |

Table 4: Statistics and references for the NLP classification tasks.

| Dataset           | Train samples | Valid. samples | Test samples | Classes | Lang    | Len (chars) | Reference               |
|-------------------|---------------|----------------|--------------|---------|---------|-------------|-------------------------|
| 20 Newsgroups     | 15,076        | 1,885          | 1,885        | 20      | En      | 2,000       | (Lang, 1995)            |
| Airline           | 11,712        | 1,464          | 1,464        | 3       | En      | 104         | crowdfunder.com         |
| Brown Corpus      | 400           | 50             | 50           | 15      | En      | 20,000      | (Francis & Kuera, 1982) |
| Complaints        | 146,667       | 18,333         | 18,334       | 157     | En      | 1,000       | catalog.data.gov        |
| Corp Messaging    | 2,494         | 312            | 312          | 4       | En      | 121         | crowdfunder.com         |
| Customer Reviews  | 3,044         | 378            | 378          | 2       | En      | 100         | (Hu & Liu, 2004)        |
| Disasters         | 8,688         | 1,086          | 1,086        | 2       | En      | 101         | crowdfunder.com         |
| Economic News     | 6,392         | 799            | 800          | 2       | En      | 1,400       | crowdfunder.com         |
| Emotion           | 32,000        | 4,000          | 4,000        | 13      | En      | 73          | crowdfunder.com         |
| Global Warming    | 3,380         | 422            | 423          | 2       | En      | 112         | crowdfunder.com         |
| MPQA Opinion      | 8,547         | 1,025          | 1,034        | 2       | En      | 19          | (Deng & Wiebe, 2015)    |
| News Aggregator   | 338,349       | 42,294         | 42,294       | 4       | En      | 57          | (Lichman, 2013)         |
| Political Message | 4,000         | 500            | 500          | 9       | En      | 205         | crowdfunder.com         |
| Primary Emotions  | 2,019         | 252            | 253          | 18      | En      | 87          | crowdfunder.com         |
| Prog Opinion      | 927           | 116            | 116          | 3       | En      | 102         | crowdfunder.com         |
| Sentiment Cine    | 3119          | 382            | 377          | 2       | Spanish | 2,760       | (Cruz et al., 2008)     |
| Sentiment IMDB    | 19946         | 5054           | 25000        | 2       | En      | 1,360       | (Maas et al., 2011)     |
| Sentiment SST     | 67,349        | 872            | 1,821        | 2       | En      | 105         | (Socher et al., 2013)   |
| SMS Spam          | 4,459         | 557            | 557          | 2       | En      | 81          | (Almeida et al., 2011)  |
| Subj Movie        | 8052          | 972            | 976          | 2       | En      | 127         | (Pang et al., 2002)     |
| US Economy        | 3,961         | 495            | 495          | 2       | En      | 305         | crowdfunder.com         |

Table 5: Statistics and references for the Image classification tasks.

| Dataset  | Train samples | Valid. samples | Test samples | Classes | Image size | Reference              |
|----------|---------------|----------------|--------------|---------|------------|------------------------|
| Cifar 10 | 45000         | 5000           | 10000        | 10      | 32x32x3    | (Krizhevsky et al.)    |
| Mnist    | 55000         | 5000           | 10000        | 10      | 28x28x1    | (LeCun & Cortes, 2010) |
| Flowers  | 2018          | 552            | 550          | 5       | variablex3 | goo.gl/tpzfr1          |

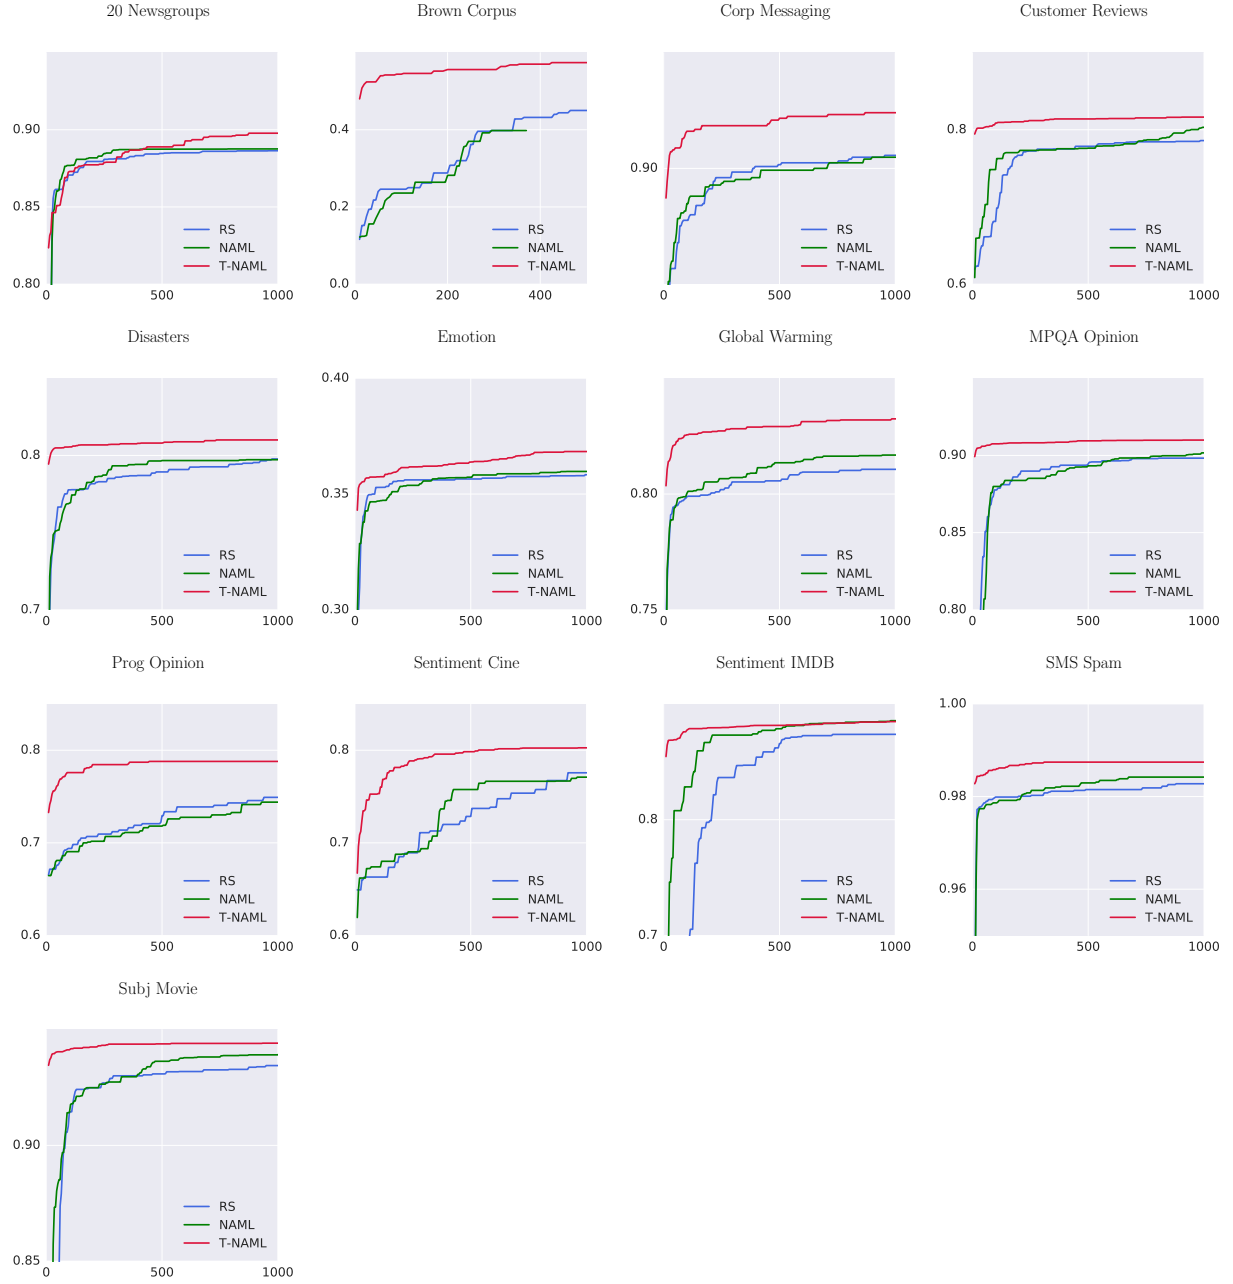

Figure 1: Learning curves for transfer learning. X-axis depicts number of trials (T) performed for each task. Y-axis depicts the mean validation accuracy of the 10 models achieving top validation accuracy (validation accuracy-top10).

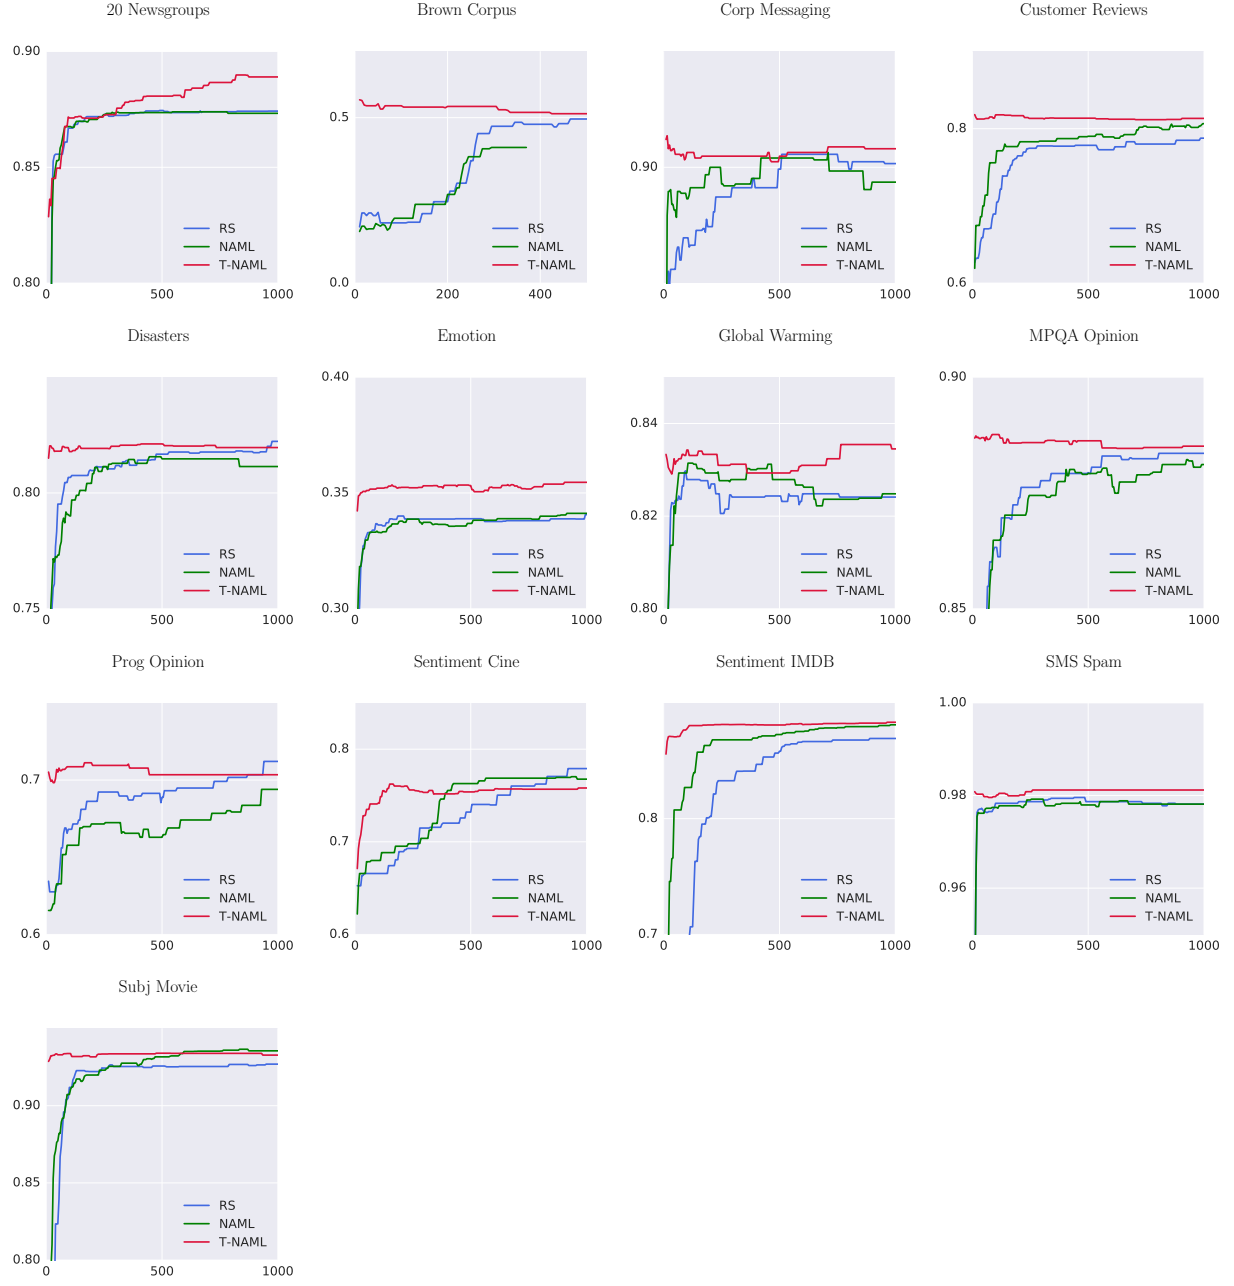

Figure 2: Learning curves for transfer learning. X-axis depicts number of trials (T) performed for each task. Y-axis depicts the mean test accuracy of the 10 models achieving top validation accuracy (test accuracy-top10).

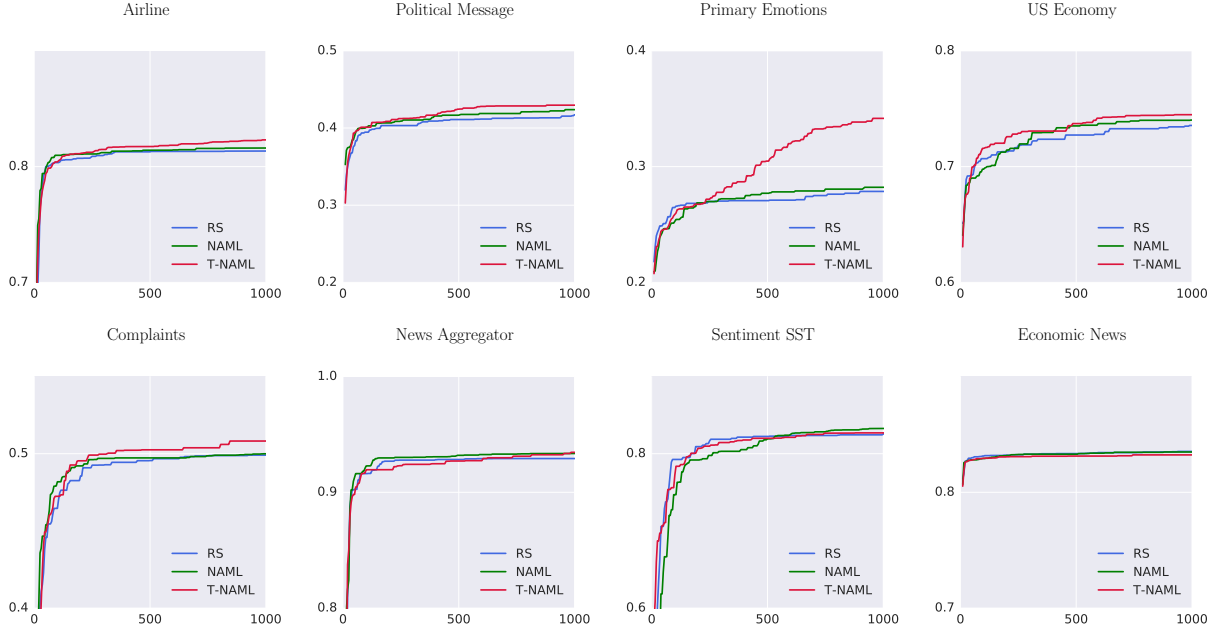

Figure 3: Learning curves for multitask training. X-axis depicts number of trials (T) performed for each task. Y-axis depicts the mean validation accuracy of the 10 models achieving top validation accuracy (validation accuracy-top10).

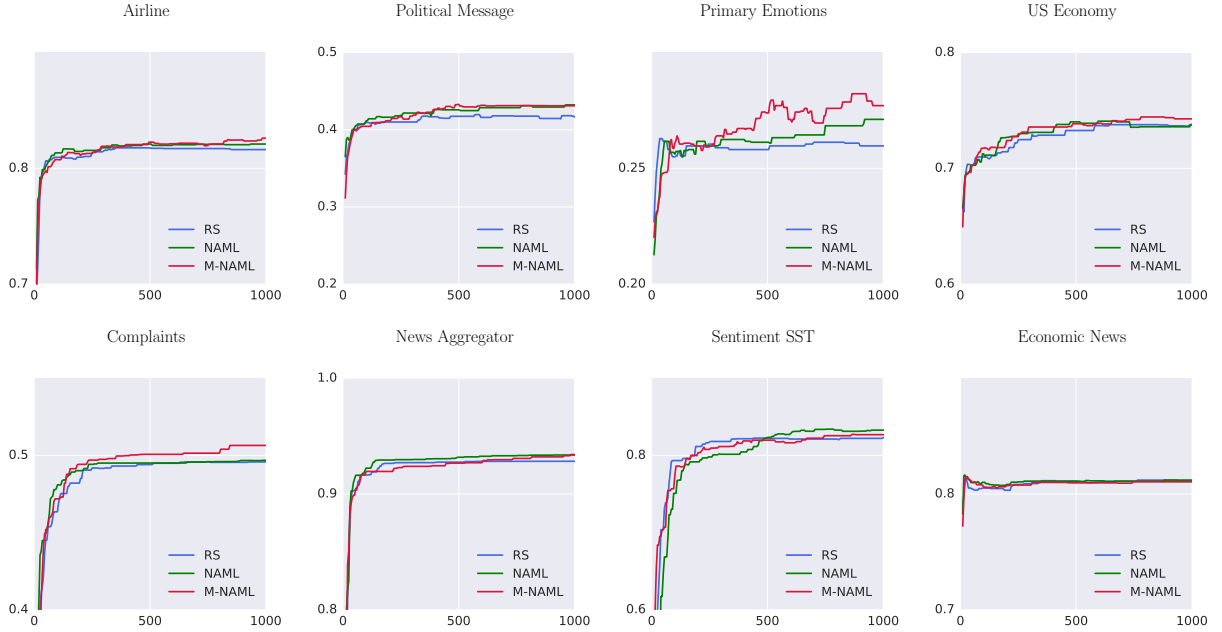

Figure 4: Learning curves for multitask training. X-axis depicts number of trials (T) performed for each task. Y-axis depicts the mean test accuracy of the 10 models achieving top validation accuracy (test accuracy-top10).

## References

- Almeida, Tiago A., Hidalgo, José María G., and Yamakami, Akebo. Contributions to the study of sms spam filtering: New collection and results. In *Proceedings of the 11th ACM Symposium on Document Engineering*, DocEng '11, New York, NY, USA, 2011. ACM.
- Cruz, Fermín L, Troyano, Jose A, Enriquez, Fernando, and Ortega, Javier. Clasificación de documentos basada en la opinión: experimentos con un corpus de criticas de cine en espanol. *Procesamiento del lenguaje natural*, 2008.
- Deng, Lingjia and Wiebe, Janyce. Mpqa 3.0: Entity/event-level sentiment corpus. In *ACL*, Denver, Colorado, USA, 2015. Sociedad Española para el Procesamiento del Lenguaje Natural.
- Francis, W. Nelson and Kuera, Henry. Frequency analysis of english usage. lexicon and grammar. In *Houghton Mifflin*, 1982.
- He, Kaiming, Zhang, Xiangyu, Ren, Shaoqing, and Sun, Jian. Deep residual learning for image recognition. *CoRR*, abs/1512.03385, 2015.
- Howard, Andrew G., Zhu, Menglong, Chen, Bo, Kalenichenko, Dmitry, Wang, Weijun, Weyand, Tobias, Andreetto, Marco, and Adam, Hartwig. Mobilenets: Efficient convolutional neural networks for mobile vision applications. *CoRR*, abs/1704.04861, 2017. URL <http://arxiv.org/abs/1704.04861>.
- Hu, Mingqing and Liu, Bing. Mining and summarizing customer reviews. In *Proceedings of the Tenth ACM SIGKDD International Conference on Knowledge Discovery and Data Mining*, KDD '04, New York, NY, USA, 2004. ACM.
- Ioffe, Sergey and Szegedy, Christian. Batch normalization: Accelerating deep network training by reducing internal covariate shift. *CoRR*, abs/1502.03167, 2015.
- Krizhevsky, Alex, Nair, Vinod, and Hinton, Geoffrey. Cifar-10 (canadian institute for advanced research).
- Lang, Ken. Newsweeder: Learning to filter netnews. In *ICML*, 1995.
- LeCun, Yann and Cortes, Corinna. MNIST handwritten digit database. 2010.
- Lichman, M. UCI machine learning repository, 2013.
- Maas, Andrew L., Daly, Raymond E., Pham, Peter T., Huang, Dan, Ng, Andrew Y., and Potts, Christopher. Learning word vectors for sentiment analysis. In *ACL: Human Language Technologies*. ACL, 2011.
- Pang, Bo, Lee, Lillian, and Vaithyanathan, Shivakumar. Thumbs up?: Sentiment classification using machine learning techniques. In *EMNLP*, Stroudsburg, PA, USA, 2002. ACL.
- Socher, Richard, Perelygin, Alex, Wu, Jean, Chuang, Jason, Manning, Christopher D., Ng, Andrew, and Potts, Christopher. Recursive deep models for semantic compositionality over a sentiment treebank. In *EMNLP*. ACL, 2013.
- Szegedy, Christian, Vanhoucke, Vincent, Ioffe, Sergey, Shlens, Jonathon, and Wojna, Zbigniew. Rethinking the inception architecture for computer vision. *CoRR*, abs/1512.00567, 2015.
